# Supplementary material for: Association Between Leaf Photosynthesis and Biomass Accumulation in Rice Illustrated by A Comprehensive Gas Exchange Profile Across the Growing Season
Source: Research Square preprint supplement (doi:10.21203/rs.3.rs-122309/v1), 2020-12-11
Supplement: Supplementary file 1 [file 7c01e7b6a8408710c4755642.xlsx]

## Sheet: Sheet1
Supplementary dataset. Values of the traits shown in Figures 4 and S5. AGB II, dry weight of aboveground biomass at second sampling; CGR Phase II, crop growth rate during Phase II; Amax, maximum fitted value of A during Phase II; Aall, accumulated A during Phase II; A80, accumulated A from 72 days after transplanting (DAT) to Donset; Adec, accumulated A from Donset to 128 DAT; Donset, 1 day befor…
Line name	ABG II [g m-2]	CGR Phase II [g m-2 day-1]	Amax [μmol m-2 s-1]	Aall [μmol m-2 s-1 phase-1]	A80 [μmol m-2 s-1 phase-1]	Adec [μmol m-2 s-1 phase-1]	Donset [day]	DTH [day]	LAmean Phase II [cm2]	SPAD80	SPADdec
Koshihikari	1455.99	15.5769	25.3214	1104.75	742.888	361.862	102	90	45.3376	36.1034	30.1774
Takanari	2065.72	23.213	31.7818	1399.32	1013.98	385.332	105	97	66.6658	40.7646	35.0873
SL1201	1548.39	14.8126	21.6954	933.707	597.238	336.469	100	90	49.2987	34.2992	31.7764
SL1202	1389.05	12.9451	23.1557	790.539	384.516	406.024	89	89	45.1678	35.8985	30.6116
SL1203	1501.81	14.7199	25.5831	998.809	628.989	369.82	97	90	42.224	35.2845	30.1142
SL1204	1415.92	13.0815	26.7524	1109.37	757.976	351.397	101	93	47.9632	33.8084	32.0199
SL1205	1258.63	12.3016	26.4273	1189.14	805.945	383.194	103	93	44.5406	37.6838	34.6694
SL1206	1728.53	18.7685	29.1181	1207.89	757.197	450.694	99	93	45.8611	35.0156	31.2085
SL1207	1526.13	16.2671	27.7794	1176.61	766.654	409.957	100	93	46.7226	36.9311	33.8003
SL1209	1677.77	19.1934	25.9952	1136.11	818.758	317.354	104	93	41.6357	34.8433	29.934
SL1210	1438.56	14.7706	25.7708	1144.69	778.593	366.098	103	93	45.1921	34.7864	32.422
SL1211	1469.93	14.8032	24.3096	1011.72	648.662	363.056	99	95	47.9125	34.5018	30.094
SL1212	1638.8	17.5824	26.3849	1169.38	825.337	344.04	104	97	48.6718	34.8489	31.8512
SL1213	1433.12	14.417	26.3553	1129.78	799.694	330.084	103	94	50.5288	35.6962	31.8906
SL1214	1341.67	11.0884	26.3491	1032.44	649.414	383.03	97	90	41.1236	35.7529	29.0628
SL1215	1484.92	16.5096	25.2671	1045.55	720.702	324.852	101	91	45.0386	35.0915	29.1457
SL1216	1528.3	15.8666	26.4908	1086.43	705.727	380.705	99	91	41.9134	34.6355	28.5454
SL1217	1638.36	16.6647	26.9657	1142.49	742.768	399.721	100	91	30.5504	39.4888	34.1385
SL1218	1511.19	15.7918	26.9332	1194.21	816.098	378.109	103	92	44.5126	36.3547	33.6123
SL1219	1462.98	12.4818	26.3965	1087.38	729.96	357.416	100	86	41.9897	37.4576	31.5097
SL1220	1500.91	15.9285	27.6555	1079.5	648.383	431.116	96	91	44.3506	34.7437	29.7884
SL1221	1856.71	19.4206	25.4834	1108.94	773.053	335.885	103	92	49.5624	33.3577	29.9535
SL1222	1147.19	7.93031	26.3245	995.515	536.736	458.779	93	84	31.4139	39.3392	34.5003
SL1223	1727.77	19.0047	25.0573	1064.98	737.093	327.889	102	93	43.6439	33.7392	28.4822
SL1224	1596.44	15.6676	26.6168	1109.85	731.365	378.488	100	91	52.5289	34.9597	30.6116
SL1225	1549.66	15.9976	25.7887	1116.9	775.451	341.449	103	95	45.9904	33.1056	27.7649
SL1226	1410.12	12.6645	27.3786	1044.72	620.274	424.442	95	89	39.451	36.328	29.476
SL1227	1709.02	19.8677	24.6586	1078.97	746.391	332.582	103	98	49.1509	33.2287	29.7764
SL1228	1720.06	18.3771	27.0395	1122.98	718.477	404.504	99	93	47.5968	34.4152	30.0429
SL1229	1442.52	13.642	24.793	1058.13	687.228	370.904	100	91	41.9909	34.321	27.957
SL1230	1699.02	17.3307	24.7152	1035.14	657.705	377.433	99	90	44.1832	34.2705	31.0849
SL1231	1483.85	14.1754	27.6124	1167.01	809.793	357.22	102	91	47.2579	34.9918	31.3511
SL1232	1424.2	14.2611	28.7736	1278.28	877.141	401.144	103	91	41.2203	36.7878	32.0942
SL1233	1538.63	15.2042	24.9989	1005.82	665.757	340.061	99	91	42.5045	34.6648	28.9524
SL1234	1268.11	10.7705	27.7838	1192.64	818.173	374.464	102	92	38.2806	34.7094	31.3122
SL1235	1503.44	15.253	28.9853	1239.24	825.057	414.184	101	90	43.6913	35.2045	33.2309
SL1236	1505.61	15.4257	25.3399	1123.38	798.437	324.94	104	91	47.2334	35.802	32.0845
SL1237	1440.11	13.5055	27.6729	1176.3	786.016	390.285	102	92	41.8261	36.5489	32.1728
SL1238	1473.36	13.9609	27.7363	1152.87	765.792	387.082	100	91	42.8874	36.3884	31.1958
SL1239	1683.55	17.8438	26.5878	1112.87	724.183	388.685	100	92	43.2932	35.3662	29.623
SL1240	1347.35	12.0471	28.5457	1082.84	669.45	413.394	96	92	41.9697	34.952	29.2828
SL1241	1603.18	14.9896	27.4584	1108.57	656.589	451.983	97	92	41.1895	36.253	33.3018
SL1301	1871.78	21.3901	28.7834	1353.56	1031.8	321.755	109	98	58.7725	39.8873	33.4355
SL1302	2108.89	24.5049	29.5851	1460.31	1174.66	285.642	113	99	68.6514	40.2701	35.1162
SL1303	2149.13	24.0652	29.3425	1305.99	987.429	318.56	107	99	71.8337	38.4985	31.241
SL1304	2211.57	25.5336	30.2623	1332.84	1015.34	317.494	106	99	76.1855	37.8407	28.7078
SL1305	1845.15	21.7063	29.9961	1387.96	996.318	391.644	106	97	66.9951	39.0336	33.8803
SL1306	1989.94	22.2953	31.0612	1400.26	1021.72	378.538	106	99	70.0988	39.6728	33.8459
SL1307	1728.08	17.5581	29.0388	1292.23	910.885	381.346	104	94	55.0211	36.9924	27.0662
SL1308	1765.4	18.977	28.6543	1286.67	923.481	363.189	105	95	59.6253	38.6932	32.0753
SL1309	1844.32	20.2238	27.2588	1366.23	1104.2	262.024	113	99	62.6125	39.6202	33.9454
SL1310	1810.19	18.1699	32.2799	1447.06	914.844	532.216	101	97	63.6935	40.3088	36.19
SL1311	1967.23	20.5859	28.7859	1298.03	977.668	320.365	107	92	51.0412	39.2204	32.4132
SL1312	1821.57	18.9559	28.4862	1265.17	882.577	382.597	104	93	56.6258	39.6653	33.8529
SL1313	1826.99	20.8848	28.4997	1396.81	1083.44	313.373	111	100	74.5899	38.7244	32.0602
SL1314	1977.6	23.3909	29.0789	1357.72	986.311	371.406	107	100	75.2631	39.2338	33.8842
SL1315	1617.66	18.1801	26.7662	1247.51	940.341	307.171	108	98	76.7037	37.3598	32.2587
SL1316	1843.38	20.0829	29.5619	1342.88	995.396	347.48	107	96	63.1607	39.1275	31.3124
SL1317	1748.79	21.9307	28.7627	1347.13	1010.68	336.46	110	101	61.3133	39.6907	33.4894
SL1318	1904.8	20.839	29.1175	1342.22	982.839	359.382	107	96	68.6112	40.06	33.3909
SL1319	2100.35	24.4349	28.4741	1404.61	1137.33	267.28	113	100	70.8935	38.6642	33.1894
SL1321	1650.95	18.0625	26.1295	1280.08	997.663	282.419	112	95	56.7511	40.4966	34.9983
SL1322	1791.31	20.6493	28.1648	1418.54	1165.66	252.885	114	99	61.4514	40.2942	33.6835
SL1323	1846.99	18.9565	32.06	1440.44	1027.24	413.199	105	99	62.0297	41.4468	35.4625
SL1324	1910.64	21.1328	26.9713	1216.07	846.26	369.815	104	91	51.8525	39.6684	34.6734
SL1325	1782.68	19.9203	28.855	1356.68	1084.61	272.072	111	95	51.1736	43.1186	32.4316
SL1326	1782.05	19.683	28.6019	1329.36	990.891	338.472	108	97	59.8206	40.7645	33.2006
SL1327	1965.26	23.963	29.156	1368.83	1011.77	357.057	108	100	64.4173	39.2518	35.0349
SL1328	1993.32	23.4084	29.0366	1355.01	1032.17	322.845	110	100	65.8494	40.0517	34.1648
SL1329	1868.97	21.0583	29.3689	1396.31	1089.92	306.395	110	98	69.7216	39.6479	34.6642
SL1330	2082.21	23.066	28.4017	1349.68	1057.73	291.946	110	99	74.0558	39.6843	32.4599
SL1331	1765.59	21.6775	27.8687	1394.86	1121.98	272.878	113	101	68.1312	38.6409	32.1685
SL1332	1972.88	23.331	28.4179	1383.58	1103.03	280.55	112	98	67.7779	40.2675	35.7902
SL1333	2102.44	24.2471	28.5075	1374.62	1088.93	285.694	111	99	68.7219	39.254	33.3227
SL1334	1761.61	20.2674	26.0452	1237.15	979.414	257.731	111	98	61.6642	41.8176	34.857
SL1337	1823.08	19.3818	27.7808	1243.54	870.37	373.175	104	95	64.2021	40.7551	33.7161
SL1338	1649.25	17.0925	29.0547	1362.73	1067.53	295.199	110	99	66.97	40.2341	33.9275
SL1339	1975.34	21.9487	27.3856	1341.4	1095.47	245.928	113	99	74.8665	40.0514	33.1532
