# Supplementary material for: Association Between Leaf Photosynthesis and Biomass Accumulation in Rice Illustrated by A Comprehensive Gas Exchange Profile Across the Growing Season
Source: Research Square preprint supplement (doi:10.21203/rs.3.rs-122309/v1), 2020-12-11
Supplement: Supplementary file 1 [file cf2f56631b8aa78f4abadab9.pdf]

Supplementary Material for

**Association between leaf photosynthesis and biomass accumulation in rice illustrated by a comprehensive gas exchange profile across the growing season**

Sotaro Honda, Satoshi Ohkubo, Nan Su San, Anothai Nakkasame, Kazuki Tomisawa,  
Keisuke Katsura, Taiichiro Ookawa, Atsushi J. Nagano, Shunsuke Adachi\*

\*Corresponding author: S. Adachi, [shunsuke.adachi.0210@vc.ibaraki.ac.jp](mailto:shunsuke.adachi.0210@vc.ibaraki.ac.jp)

**The PDF includes:**

Supplementary Figures S1 to S7

Supplementary Table S1

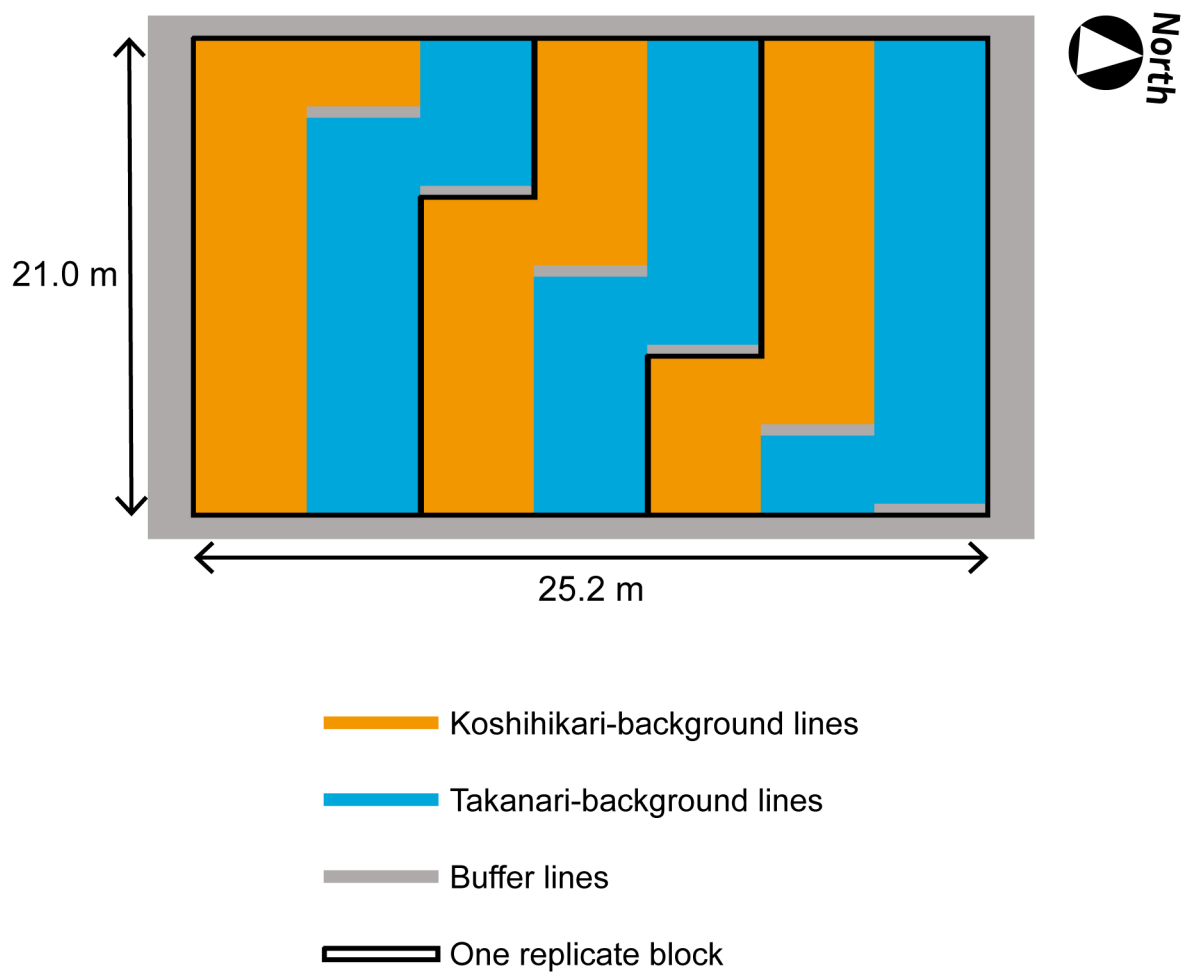

**Supplementary Figure S1.** Layout of the experimental plots in the paddy field.

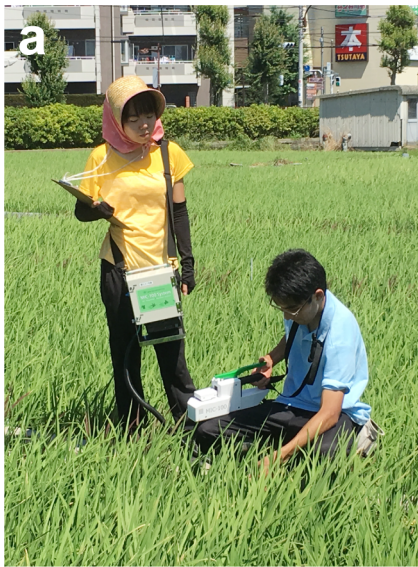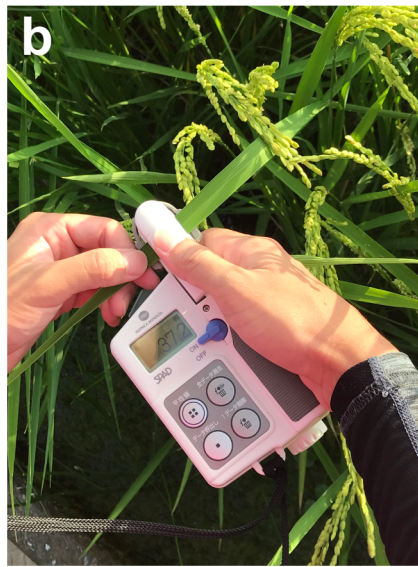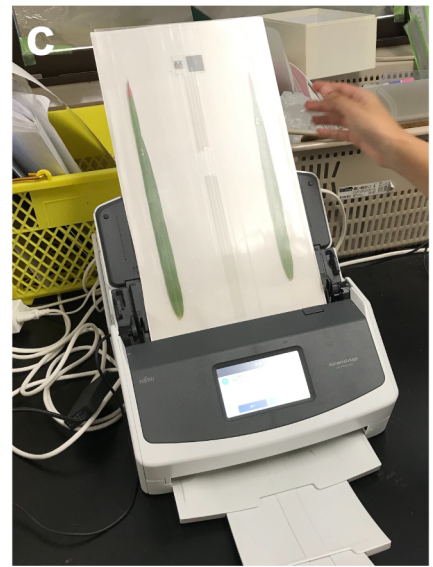

**Supplementary Figure S2.** Phenotyping procedures.

- (a) Gas exchange measurement with a MIC-100 closed-type portable photosynthesis system.
- (b) SPAD measurement with a SPAD-502 chlorophyll meter.
- (c) Scanning of leaves with a ScanSnap iX1500 document scanner.

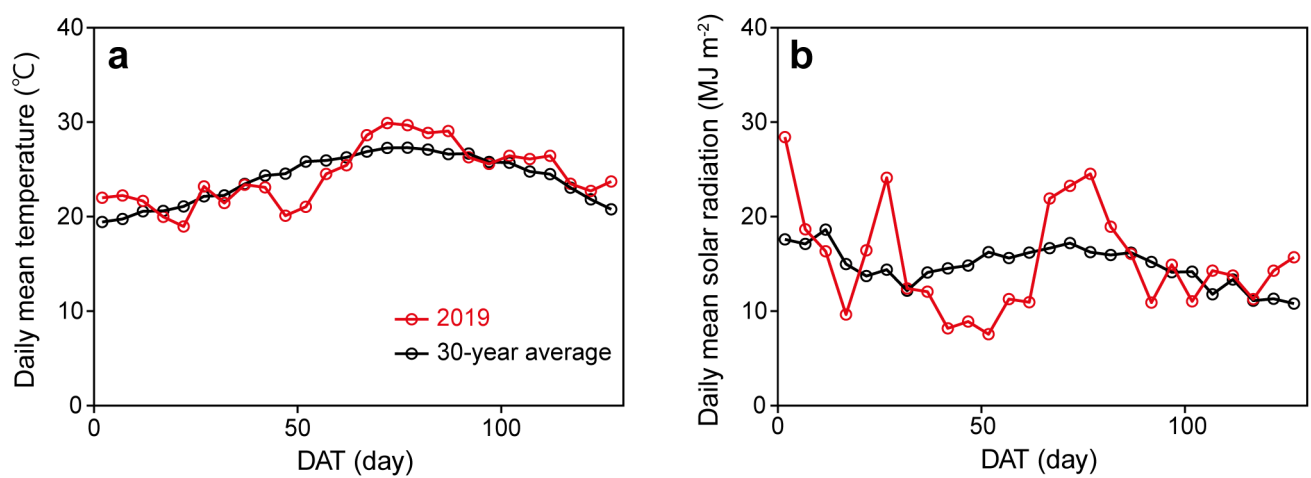

**Supplementary Figure S3.** Dynamics of **(a)** daily mean temperature and **(b)** daily mean solar radiation during the growing season. Daily mean temperature was obtained from the Automated Meteorological Data Acquisition Systems (AMeDAS) Fuchu site (35°41'N, 139°29'E) and daily mean global solar radiation was obtained from the AMeDAS Tokyo site (35°42'N, 139°45'E). The points are 5-day averages. DAT, days after transplanting.

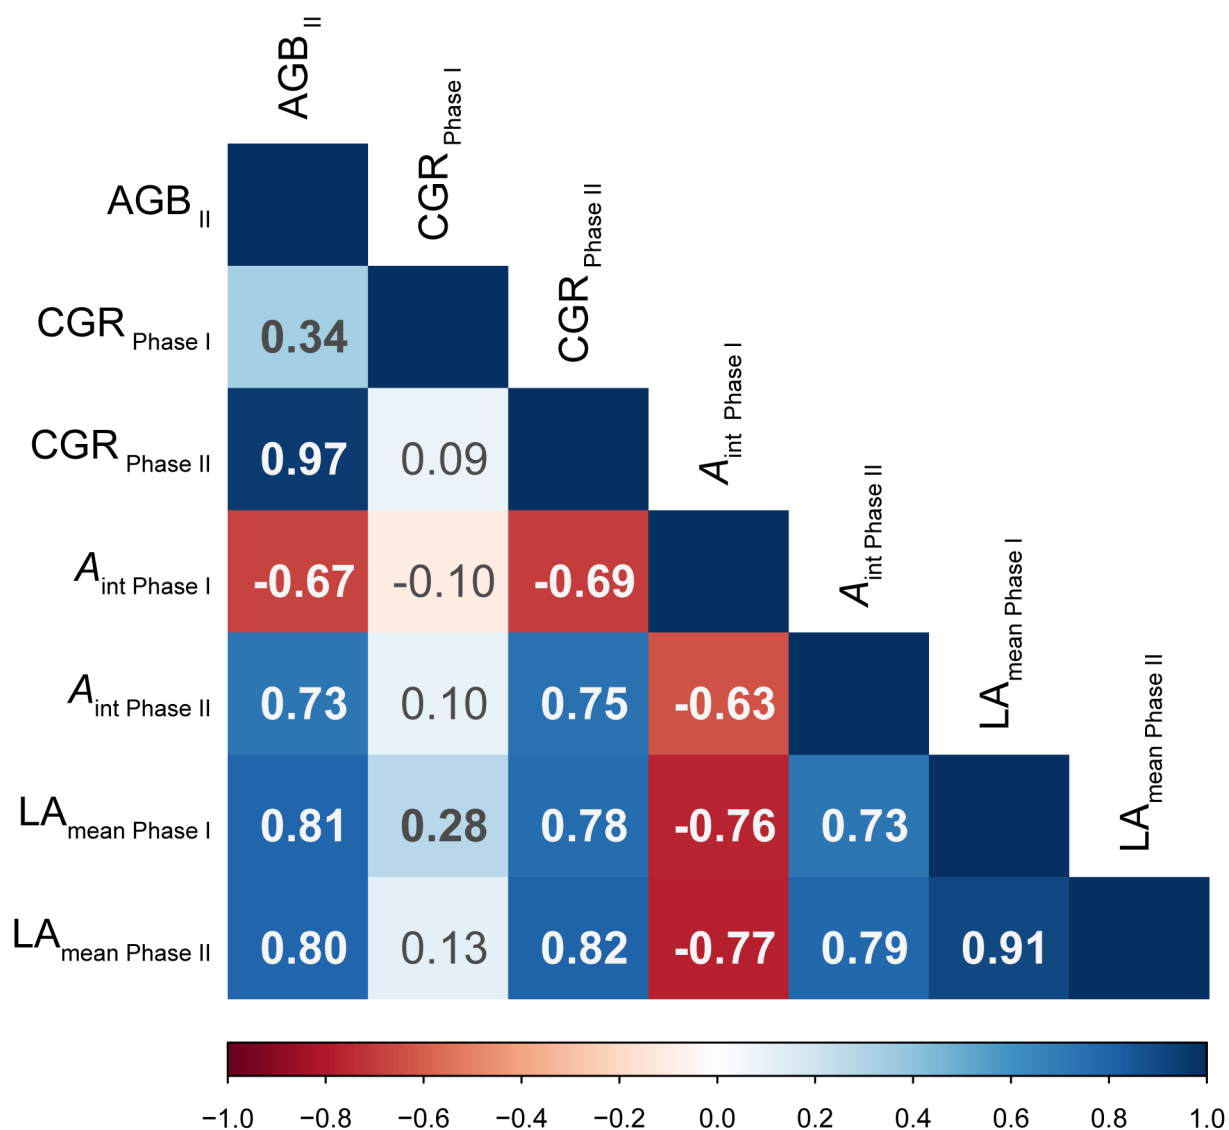

**Supplementary Figure S4.** Pearson's correlation coefficients of pairs of traits (biomass, crop growth rate, integrated CO<sub>2</sub> assimilation rate and mean single leaf area) among all lines examined. Values in bold type are significant ( $P < 0.05$ , two-sided  $t$ -test). Blue, positive correlation; red, negative correlation. AGB<sub>II</sub>, dry weight of aboveground biomass at the second sampling; CGR<sub>Phase I</sub> and CGR<sub>Phase II</sub>, crop growth rate during Phases I and II; A<sub>int Phase I</sub> and A<sub>int Phase II</sub>, integrated A during Phases I and II; LA<sub>mean Phase I</sub> and LA<sub>mean Phase II</sub>, mean single leaf area during Phases I and II.

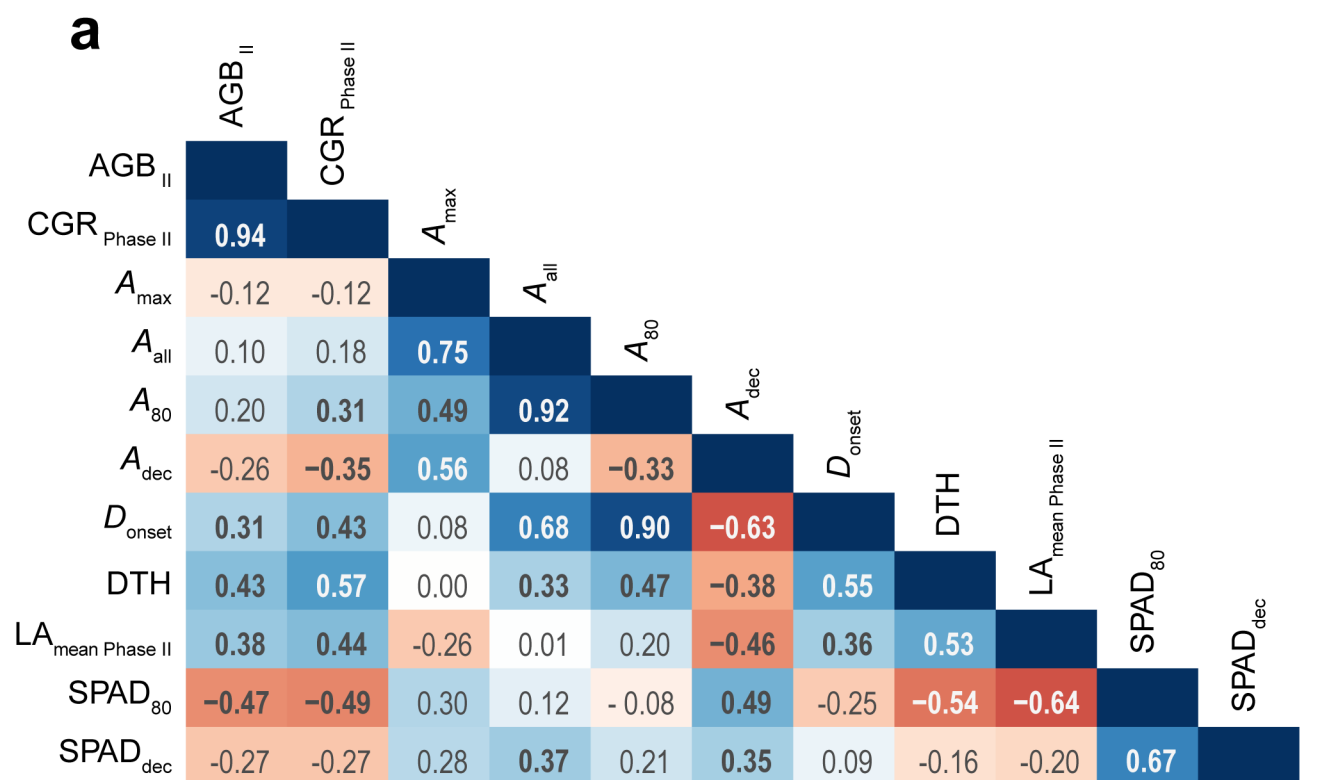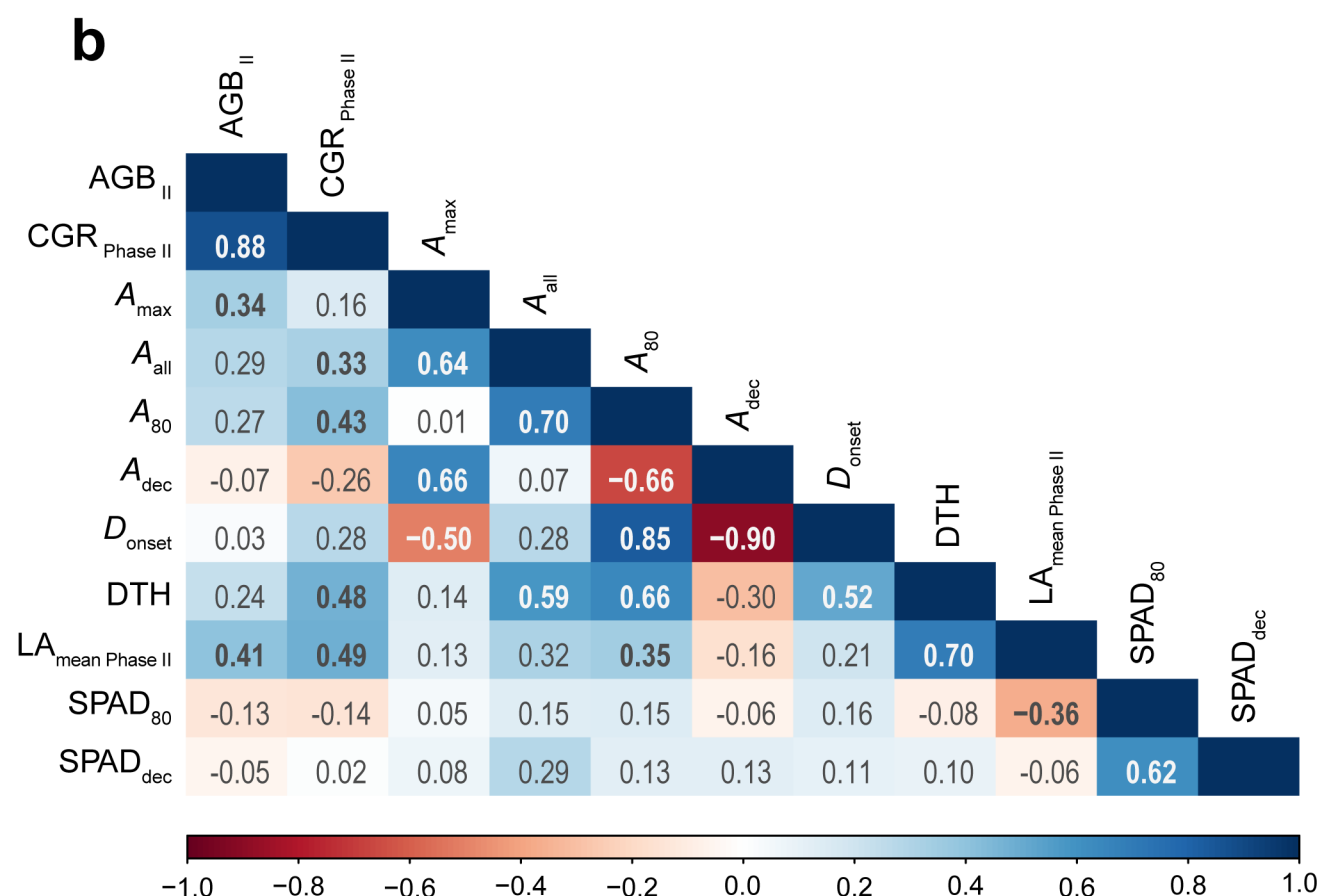

**Supplementary Figure S5.** Pearson's correlation coefficients of pairs of traits (biomass accumulation, CO<sub>2</sub> assimilation rate and other agronomic traits) in (a) Koshihikari lines and (b) Takanari lines during Phase II. Values in bold type are significant ( $P < 0.05$ , two-sided  $t$ -test). Blue, positive correlation; red, negative correlation. AGB<sub>II</sub>, dry weight of aboveground biomass at the second sampling; CGR<sub>Phase II</sub>, crop growth rate during Phase II; A<sub>max</sub>, maximum fitted value of A; A<sub>all</sub>, accumulated A during Phase II; A<sub>80</sub>, accumulated A from 72 days after transplanting (DAT) to D<sub>onset</sub>; A<sub>dec</sub>, accumulated A from D<sub>onset</sub> to 128 DAT; D<sub>onset</sub>, 1 day before A value declined below 80% of A<sub>max</sub>; DTH, days to heading; LA<sub>mean Phase II</sub>, mean value of single leaf area during Phase II; SPAD<sub>80</sub>, mean SPAD value before D<sub>onset</sub>; SPAD<sub>dec</sub>, mean SPAD value after D<sub>onset</sub>.

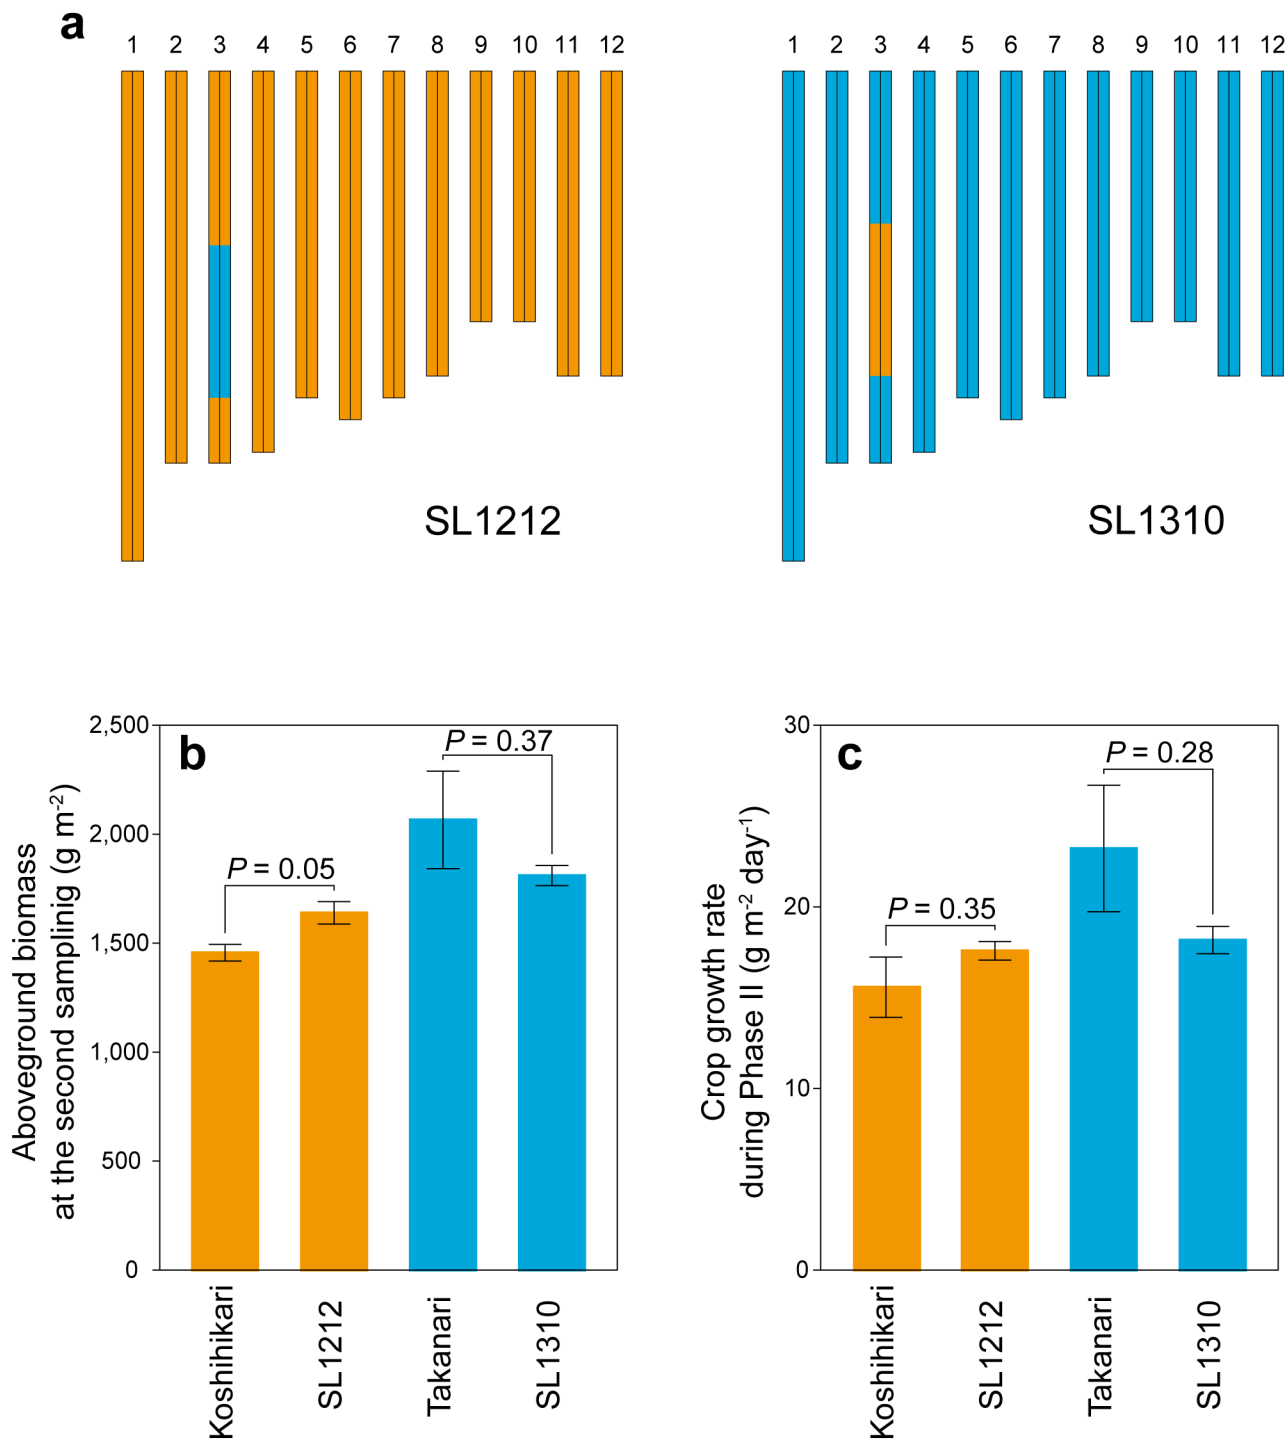

**Supplementary Figure S6.** Biomass at harvest and crop growth rate (CGR) during Phase II of Koshihikari, SL1212, Takanari and SL1310. (a) Graphical genotypes of the CSSLs; orange, Koshihikari genomic region; blue, Takanari genomic region. (b) Dry weight of aboveground biomass at the second sampling ( $\text{AGB}_{\text{II}}$ ). (c) CGR during Phase II ( $\text{CGR}_{\text{PhaseII}}$ ). Error bars represent standard error ( $n = 3$ ). Statistical differences were tested by Welch's two-sided  $t$ -test ( $n = 3$ ).

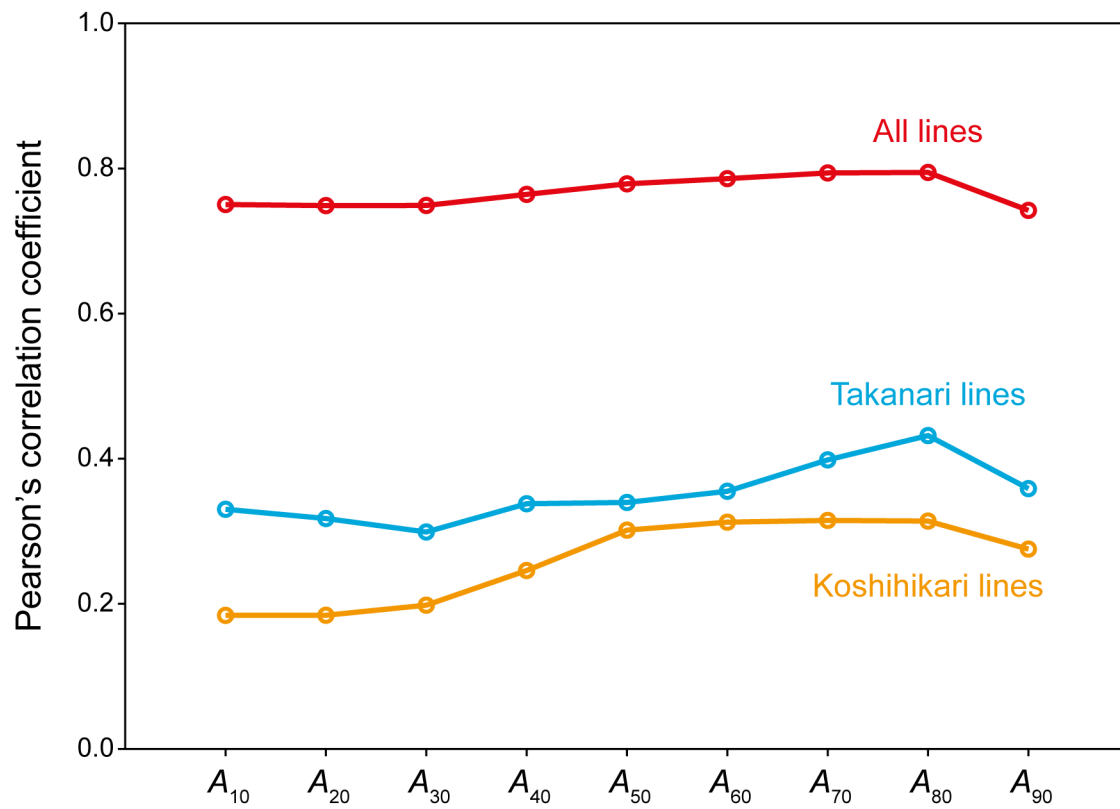

**Supplementary Figure S7.** Pearson's correlation coefficients of crop growth rate during Phase II ( $CGR_{Phase II}$ ) with accumulated  $A$  after heading. Accumulated  $A$  was the integral from 72 days after transplanting (DAT) to  $D_{onset}$  (1 day before  $A$  declined below 10%-90% of maximum  $A$ ). We selected  $A_{80}$  because it had the highest correlation in the combined data set and the Takanari line set and the second highest in the Koshihikari line set.



**Supplementary Table S1.** Standard deviations (SDs) of the traits shown in Figure 2.

| Trait                                                                                                           | Group             | Phase<br>or<br>Sampling | SD     |
|-----------------------------------------------------------------------------------------------------------------|-------------------|-------------------------|--------|
| Integrated net CO <sub>2</sub> assimilation rate<br>[μmol m <sup>-2</sup> s <sup>-1</sup> phase <sup>-1</sup> ] | Koshihikari lines | I                       | 54.61  |
|                                                                                                                 |                   | II                      | 79.83  |
|                                                                                                                 | Takanari lines    | I                       | 65.98  |
|                                                                                                                 |                   | II                      | 61.16  |
| Mean single leaf area [cm <sup>2</sup> ]                                                                        | Koshihikari lines | I                       | 2.35   |
|                                                                                                                 |                   | II                      | 4.24   |
|                                                                                                                 | Takanari lines    | I                       | 3.49   |
|                                                                                                                 |                   | II                      | 6.87   |
| Aboveground biomass [g m <sup>-2</sup> ]                                                                        | Koshihikari lines | 1 <sup>st</sup>         | 50.95  |
|                                                                                                                 |                   | 2 <sup>nd</sup>         | 141.86 |
|                                                                                                                 | Takanari lines    | 1 <sup>st</sup>         | 67.76  |
|                                                                                                                 |                   | 2 <sup>nd</sup>         | 144.70 |
| Crop growth rate [g m <sup>-2</sup> day <sup>-1</sup> ]                                                         | Koshihikari lines | I                       | 0.72   |
|                                                                                                                 |                   | II                      | 2.51   |
|                                                                                                                 | Takanari lines    | I                       | 0.95   |
|                                                                                                                 |                   | II                      | 2.17   |
